# Supplementary material for: Genetic and Bioinformatic Strategies to Improve Diagnosis in Three Inherited Bleeding Disorders in Bogotá, Colombia
Source: MDPI journal article supplement (doi:10.3390/genes12111807), 2021-11-18
Supplement: s1 [file s1]

**Table S5.** Phenotype characteristics of von Willebrand disease patients.

| Patient code | Ristocetin cofactor activity (%)<br>technique:<br>Aggregometry,<br>Immunoturbidimetry with a reference interval of Blood Group O: 53.0 - 152.8 and Blood Groups A, B, AB: 71.2 - 178.5 <sup>1</sup> | Scheme of treatment       | Administration      | Factor type                             | Dose (UI)                     | Age of treatment initiation | Medicine brands                       | Inhibitor test result | Episodes of bleeding in the last year | Hemarthrosis | Occurrences of Hemarthrosis | Chronic Hemophilic Arthropathy |
|--------------|-----------------------------------------------------------------------------------------------------------------------------------------------------------------------------------------------------|---------------------------|---------------------|-----------------------------------------|-------------------------------|-----------------------------|---------------------------------------|-----------------------|---------------------------------------|--------------|-----------------------------|--------------------------------|
| Af1VW        | 72,7                                                                                                                                                                                                | Prophylaxis/<br>on demand | NA                  | Recombinant - Vitamin K1 - Desmopressin | NA                            | 10                          | Baxter (factor), Konakion (vitamin K) | -                     | 3                                     | Yes          | 3                           | No                             |
| Af2VW        | 44                                                                                                                                                                                                  | on demand                 | Monthly/Each period | Tranexamic acid, currently Mirena       | NA                            | 22                          | NA                                    | -                     | 21                                    | No           | 0                           | No                             |
| Af3VW        | 43,7                                                                                                                                                                                                | on demand                 | NA                  | NA                                      | NA                            | NA                          | NA                                    | -                     | 48                                    | No           | 0                           | No                             |
| Am1VW        | 55,1                                                                                                                                                                                                | Prophylaxis               | 3 time/week         | Recombinant - Plasma derivative         | (1000 UI FVIII + 2400 UI FVW) | 22                          | HAEMATE P                             | -                     | 6                                     | yes          | 6                           | yes                            |
| Af4VW        | NA                                                                                                                                                                                                  | No treatment              | NA                  | NA                                      | NA                            | NA                          | NA                                    | -                     | 7                                     | No           | 0                           | No                             |

NA: No answer.

<sup>1</sup>: **FUNCTIONAL VON WILLEBRAND FACTOR: Activity (VWF: Ac), Ristocetin Cofactor (VWF: Rco):** Sample conditions included: Platelet-poor recentrifuged citrated plasma. 1 mL of plasma was separated and frozen immediately in a plastic tube. Sample, free of hemolysis and lipemia, was ship frozen on dry ice. The method used was Aggram of Helena Laboratories with a reference interval of Blood Group O: 53.0 - 152.8 and Blood Groups A, B, AB: 71.2 - 178.5. Reagents: Calibrator plasma, normal control plasma, abnormal control plasma, Ristocetin, normal platelets fixed in formalin, owren buffer. Specifications of the assay: Federici, A.B. 2016. Current and emerging approaches for assessing von Willebrand disease in 2016. International Journal of Laboratory Hematology.38 (1). 41-49
