# Supplementary material for: Genetic and Bioinformatic Strategies to Improve Diagnosis in Three Inherited Bleeding Disorders in Bogotá, Colombia
Source: MDPI journal article supplement (doi:10.3390/genes12111807), 2021-11-18
Supplement: s1 [file s1]

**Table S3.** Phenotype characteristics of Hemophilia B patients.

| Patient code | Sex                     | Age               | Blood type | Rh                  | Race           | Diagnosis              | First consultation reason | Family background      | Genetic Counseling             | Disease Classification | FIX (%) technique: coagulometric reference values: 50-150% | PT (s) coagulometric method Reference values 9.9-11.8 seconds <sup>2</sup> | PTT (s) Coagulometric mehod. Reference values: 29-32 seconds <sup>3</sup> | Arthropathy                    |
|--------------|-------------------------|-------------------|------------|---------------------|----------------|------------------------|---------------------------|------------------------|--------------------------------|------------------------|------------------------------------------------------------|----------------------------------------------------------------------------|---------------------------------------------------------------------------|--------------------------------|
| Am1B         | Male                    | 42                | O          | +                   | Caucasian      | HB                     | Hemorrhages               | Family history         | no                             | severe                 | 0,1                                                        | NA                                                                         | NA                                                                        | NA                             |
| Af1B         | Female                  | 49                | B          | +                   | Caucasian      | carrier                | NA                        | NA                     | NA                             | NA                     | NA                                                         | NA                                                                         | NA                                                                        | NA                             |
| Af1B*son     | male                    | 8                 | O          | +                   | Caucasian      | HB                     | Family history            | cousins                | no                             | moderate               | 1,5                                                        | 11,1                                                                       | 38,1                                                                      | NA                             |
| Af2B         | Female                  | 42                | O          | +                   | Caucasian      | carrier                | NA                        | NA                     | NA                             | NA                     | NA                                                         | NA                                                                         | NA                                                                        | NA                             |
| Af2B*son     |                         | 10                | O          | +                   | Caucasian      | HB                     | bruising                  | no                     | no                             | severe                 | 0,4                                                        | NA                                                                         | NA                                                                        | NA                             |
| Patient code | Ristocetin cofactor (%) | Multimer analysis | RIPA (%)   | Scheme of treatment | Administration | Factor type            | Dose (UI)                 | Age of treatment start | Medicine brands                | Inhibitor test result  | Episodes of bleeding in the last year                      | Hemarthrosis                                                               | Occurrences of Hemarthrosis                                               | Chronic Hemophilic Arthropathy |
| Am1B         | NA                      | NA                | NA         | Prophylaxis         | 1 dose/week    | Plasma derivative: FIX | 1800                      | 7                      | Immunine - Baxter              | negative               | 10                                                         | yes                                                                        | 4                                                                         | yes                            |
| Af1B         | NA                      | NA                | NA         | NA                  | NA             | NA                     | NA                        | NA                     | NA                             | NA                     | NA                                                         | NA                                                                         | NA                                                                        | no                             |
| Af1B*son     | NA                      | NA                | NA         | on demand           | NA             | Recombinant            | NA                        | 2                      | Benefix factor recombinante IX | negative               | 3                                                          | no                                                                         | NA                                                                        | no                             |
| Af2B         | NA                      | NA                | NA         | NA                  | NA             | NA                     | NA                        | NA                     | NA                             | NA                     | NA                                                         | NA                                                                         | NA                                                                        | no                             |
| Af2B*son     | NA                      | NA                | NA         | Prophylaxis         | 2 dose/week    | Recombinant            | 1000                      | 1                      | Benefix factor recombinante IX | negative               | 0                                                          | no                                                                         | NA                                                                        | no                             |

*\*Patients not included in the study. Blood samples from their relatives with a carrier status were taken. NA: No answer. Factor level measurements shown in the table are only one measurement in time that corresponds to the last measurement taken in the medical history of the patients included in the study.*

<sup>1</sup>: **COAGULATION FACTOR IX (Christmas Factor, Antihemophilic Factor B)**: Sample conditions included: Platelet-poor recentrifuged citrated plasma. 1 mL of plasma was separated and frozen immediately in a plastic tube. Sample, free of hemolysis and lipemia, was ship frozen on dry ice. The method used was the clot formation with a reference interval of 50 - 150%. Specifications of the assay: Automated single-layer clot performed on CS2100i coagulometer. Reagents: Calibrator plasma, normal control plasma, abnormal control plasma, FIX deficient plasma, PTT reagent: Actin FSL, Calcium chloride, owren buffer. Konkle, B., Huston, H., Nakaya, S. 2017. Synonyms: Christmas Disease, Factor IX Deficiency. Gene Reviews.

<sup>2</sup>: **PT (PROTHROMBIN TIME)**: Sample conditions included: Platelet-poor recentrifuged citrated plasma. 1 mL of plasma was separated and frozen immediately in a plastic tube. Sample, free of hemolysis and lipemia, was ship frozen on dry ice. The method used was the clot formation. Specifications of the assay: Clot, automated performed on CS2100i coagulometer. Reagents: normal control plasma, abnormal control plasma, Innovin: recombinant thromboplastin (Siemens Healthcare. 2013. Guide insert).

<sup>3</sup>: **PTT (THROMBOPLASTIN PART TIME)**: Sample conditions included: Platelet-poor recentrifuged citrated plasma. 1 mL of plasma was separated and frozen immediately in a plastic tube. Sample, free of hemolysis and lipemia, was ship frozen on dry ice. The method used was the clot formation with a reference interval of 9.9-11.82 seconds. Specifications of the assay: Clot, automated performed on CS2100i coagulometer. Reagents: Normal control plasma, abnormal control plasma, PTT reagent: Actin FSL, Calcium chloride. Siemens Healthcare. 2010. Guide insert.
