# Supplementary material for: Genetic and Bioinformatic Strategies to Improve Diagnosis in Three Inherited Bleeding Disorders in Bogotá, Colombia
Source: MDPI journal article supplement (doi:10.3390/genes12111807), 2021-11-18
Supplement: s1 [file s1]

**Table S1.** Phenotype characteristics of Hemophilia A patients.

| Patient code     | Sex    | Age | Blood type | Rh | Race      | Diagnosis    | First consultation reason                             | Family background                                                                            | Genetic Counseling | Disease Classification                    | FVIII (%) coagulometric method reference values 50-150% <sup>1</sup>                                | von Willebrand Factor (Antigen) technique: immunocapture reference values 50-160% <sup>2</sup> |
|------------------|--------|-----|------------|----|-----------|--------------|-------------------------------------------------------|----------------------------------------------------------------------------------------------|--------------------|-------------------------------------------|-----------------------------------------------------------------------------------------------------|------------------------------------------------------------------------------------------------|
| Af1A             | Female | 25  | O          | +  | Caucasian | carrier      | Family history                                        | mother and brothers                                                                          | no                 | carrier                                   | 24,3                                                                                                | 60,0                                                                                           |
| Brother of Af1A* | Male   | 31  | A          | +  | Caucasian | hemophilia A | Family history                                        | mother and brothers                                                                          | no                 | moderate with severe presentation pattern | 1,2                                                                                                 | NA                                                                                             |
| Af2A             | Female | 29  | O          | +  | Caucasian | carrier      | Family history                                        | mother brothers. 18-month-old brother deceased. Dosage of coagulation FVIII evaluated at 1%. | no                 | carrier                                   | 71,3                                                                                                | 75,0                                                                                           |
| Am1A             | Male   | 44  | O          | +  | Caucasian | hemophilia A | Hemorrhages                                           | Brothers and cousins                                                                         | no                 | mild                                      | 4                                                                                                   | 70                                                                                             |
| Am2A             | Male   | 59  | O          | +  | Caucasian | hemophilia A | Hemorrhages                                           | Nephew and Cousins                                                                           | no                 | severe                                    | 0,9                                                                                                 | NA                                                                                             |
| Af3A             | Female | 36  | B          | +  | Caucasian | carrier      | Abundant menorragia – Son with hemophilia A diagnosis | no family background                                                                         | no                 | carrier                                   | 108.4 (last data at the time of entering the study) 30.0 (data considered at the time of diagnosis) | 116,6                                                                                          |

|              |        |    |   |   |           |              |                            |                                           |     |         |      |       |
|--------------|--------|----|---|---|-----------|--------------|----------------------------|-------------------------------------------|-----|---------|------|-------|
| Son of Af3A* | Male   | 3  | O | + | Caucasian | hemophilia A | bruises                    | no family background                      | no  | severe  | 0,33 | NA    |
| Am3A         | Male   | 28 | O | + | Native    | hemophilia A | bruises, mucous bleeding   | mother father and brothers                | no  | severe  | 1,3  | NA    |
| Af4A         | Female | 68 | O | + | Caucasian | carrier      | family history-Hemorrhages | mother, brothers, cousins and grandfather | no  | carrier | 83,2 | 103,0 |
| Am4A         | Male   | 40 | A | + | Caucasian | hemophilia A | Hemorrhages                | no family background                      | yes | severe  | 0,4  | NA    |
| Am5A         | Male   | 61 | A | + | Caucasian | hemophilia A | Family history             | Brothers and cousins                      | no  | mild    | 45,7 | NA    |
| Am6A         | Male   | 83 | O | - | Caucasian | hemophilia A | coronary bypass surgery    | Nephew                                    | no  | mild    | 14   | NA    |
| Am7A         | Male   | 27 | O | + | Native    | hemophilia A | Hemorrhages                | Cousin                                    | no  | severe  | 0,83 | NA    |

*\*Patients not included in the study. Blood samples from their relatives with a carrier status were taken. NA: No answer.*

*Factor level measurements shown in the table are only one measurement in time that corresponds to the last measurement taken in the medical history of the patients included in the study. Some factor levels can be altered by pregnancy, age, hormonal changes, among others.*

<sup>1</sup>: **COAGULATION FACTOR VIII (Antihemophilic Factor A):** Sample conditions included: Platelet-poor recentrifuged citrated plasma. 1 mL of plasma was separated and frozen immediately in a plastic tube. Sample, free of hemolysis and lipemia, was ship frozen on dry ice. The method used was the clot formation with a reference interval of 50 - 150%. Specifications of the assay: One-stage assay. Clot of an atapa, automated performed on a CS2100i coagulometer. Reagents: Calibrator plasma, normal control plasma, abnormal control plasma, FVIII deficient plasma, PTT reagent: Actin FSL, Calcium chloride, owren buffer.

<sup>2</sup>: **VON WILLEBRAND ANTIGEN FACTOR (VWF:Ag):** Sample conditions included: Platelet-poor recentrifuged citrated plasma. 1 mL of plasma was separated and frozen immediately in a plastic tube. Sample, free of hemolysis and lipemia, was ship frozen on dry ice. The method used was Immunoturbidimetry, automated performed on a CS2100i coagulometer, with a reference interval of 50-160%. Reagents: Calibrator plasma, normal control plasma, abnormal control plasma, Von Willebrand Antigen measurement kit. Specifications of the assay: Haberichter, S. 2016. Von Willebrand factor propeptide: biology and clinical utility. Blood Journal. 126 (15). 1753-1761
