# Supplementary material for: Genetic and Bioinformatic Strategies to Improve Diagnosis in Three Inherited Bleeding Disorders in Bogotá, Colombia
Source: MDPI journal article supplement (doi:10.3390/genes12111807), 2021-11-18
Supplement: s1 [file s1]

**Table S2.** Phenotype characteristics of Hemophilia A patients.

| Patient code     | Ristocetin cofactor (%) technique: Aggregometry, Immunosorbimetry with a reference interval of Blood Group O: 53.0 - 152.8 and Blood Groups A, B, AB: 71.2 - 178.5 <sup>1</sup> | Multimer analysis                   | RIPA (%) technique: aggregometry reference values: Ristocetin 1.2: 50 - 100% Ristocetin 0.5: no aggregation observed <sup>2</sup> | Scheme of treatment | Administration   | Factor type       | Dose (UI) | Age of treatment start | Medicine brands                | Inhibitor test result | Episodes of bleeding in the last year | Hemarthrosis                                                                  | Occurrences of Hemarthrosis | Chronic Hemophilic Arthropathy |
|------------------|---------------------------------------------------------------------------------------------------------------------------------------------------------------------------------|-------------------------------------|-----------------------------------------------------------------------------------------------------------------------------------|---------------------|------------------|-------------------|-----------|------------------------|--------------------------------|-----------------------|---------------------------------------|-------------------------------------------------------------------------------|-----------------------------|--------------------------------|
| Af1a             | 59,0                                                                                                                                                                            | NA                                  | 83,4                                                                                                                              | No treatment        | NA               | NA                | NA        | NA                     | NA                             | -                     | 0                                     | no                                                                            | 0                           | no                             |
| Brother of Af1A* | NA                                                                                                                                                                              | NA                                  | NA                                                                                                                                | Prophylaxis         | 3 times/week     | Plasma derivative | 2000      | 27                     | Hemofil: Plasma derivative     | -                     | 0                                     | yes (Hemophilic arthropathy of right elbow, knees, ankles and left shoulder.) | 4                           | yes                            |
| Af2A             | NA                                                                                                                                                                              | NA                                  | NA                                                                                                                                | No treatment        | NA               | NA                | NA        | NA                     | NA                             | -                     | 1                                     | no                                                                            | 0                           | no                             |
| Am1A             | NA                                                                                                                                                                              | NA                                  | NA                                                                                                                                | on demand           | 4 times in total | Recombinant       | NA        | 1                      | NA                             | -                     | 365 daily rectal bleeding             | no                                                                            | 0                           | no                             |
| Am2A             | NA                                                                                                                                                                              | NA                                  | NA                                                                                                                                | Prophylaxis         | 3 times/week     | Recombinant       | 2000      | 48                     | Advate-octanate-beriate-xyntha | +                     | 4                                     | yes                                                                           | 4                           | yes                            |
| Af3A             | 120,9                                                                                                                                                                           | Multimers present in normal amounts | NA                                                                                                                                | No treatment        | NA               | NA                | NA        | NA                     | NA                             | -                     | NA                                    | NA                                                                            | 0                           | no                             |
| Son of Af3A*     | NA                                                                                                                                                                              | NA                                  | NA                                                                                                                                | Prophylaxis         | 2 times/week     | Recombinant       | 5         | 2                      | ADVATE-Xyntha.                 | -                     | 0                                     | yes                                                                           | 1                           | no                             |
| Am3A             | NA                                                                                                                                                                              | NA                                  | NA                                                                                                                                | on demand           | 5 times in total | Recombinant       | 2500      | 17                     | Advate-Xyntha                  | -                     | NA                                    | no                                                                            | 0                           | no                             |

|      |    |    |    |              |                  |                   |      |    |                            |    |    |     |    |     |
|------|----|----|----|--------------|------------------|-------------------|------|----|----------------------------|----|----|-----|----|-----|
| Af4A | NA | NA | NA | No treatment | NA               | NA                | NA   | NA | NA                         | NA | NA | NA  | 0  | NA  |
| Am4A | NA | NA | NA | Prophylaxis  | 3 times/week     | Plasma derivative | 1500 | 20 | Haemoctin                  | -  | 4  | yes | 4  | yes |
| Am5A | NA | NA | NA | No treatment | NA               | NA                | NA   | NA | NA                         | -  | NA | NA  | 0  | NA  |
| Am6A | NA | NA | NA | on demand    | 3 times in total | Recombinant       | 2000 | 64 | Xyntha                     | -  | no | no  | no | no  |
| Am7A | NA | NA | NA | Prophylaxis  | 3 times/week     | Plasma derivative | 2000 | 11 | Hemofil: Plasma derivative | +  | no | no  | no | yes |

*\*Patients not included in the study. Blood samples from their relatives with a carrier status were taken.*

*NA: No answer.*

<sup>1</sup>: **FUNCTIONAL VON WILLEBRAND FACTOR: Activity (VWF: Ac), Ristocetin Cofactor (VWF: Rco):** Sample conditions included: Platelet-poor recentrifuged citrated plasma. 1 mL of plasma was separated and frozen immediately in a plastic tube. Sample, free of hemolysis and lipemia, was ship frozen on dry ice. The method used was Aggram of Helena Laboratories with a reference interval of Blood Group O: 53.0 - 152.8 and Blood Groups A, B, AB: 71.2 - 178.5. Reagents: Calibrator plasma, normal control plasma, abnormal control plasma, Ristocetin, normal platelets fixed in formalin, owren buffer. Specifications of the assay: Federici, A.B. 2016. Current and emerging approaches for assessing von Willebrand disease in 2016. International Journal of Laboratory Hematology.38 (1). 41-49

<sup>2</sup>: **PLATELET AGGREGATION RIPA 2 DILUTIONS: RISTOCETIN 1.2 and 0.5:** Sample conditions included: Citrated whole blood. 5 mL at room temperature in a plastic tube. Sample, free of hemolysis and lipemia. The method used was Turbidimetry with a reference interval: Ristocetin 1.2: 50 - 100% Ristocetin 0.5: no aggregation observed. Specifications of the assay: Hayward, C., Moffat, M., Graf, L. 2014. Technological advances in diagnostic testing for von Willebrand disease: new approaches and challenges. International Journal of Laboratory Hematology. 36, 334-340
