# Supplementary figures and images for: Genetic and Bioinformatic Strategies to Improve Diagnosis in Three Inherited Bleeding Disorders in Bogotá, Colombia
Source: MDPI journal article supplement (doi:10.3390/genes12111807), 2021-11-18

Sample - melt curve

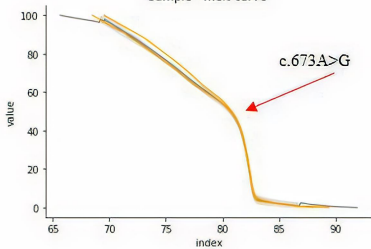

Sample- negative derivative curve

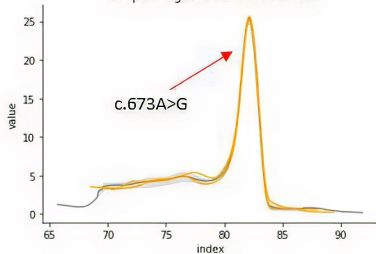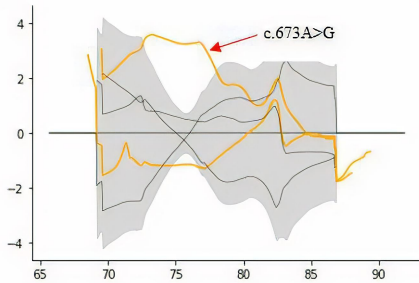

Supplement: s1 [file s1]

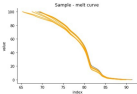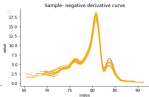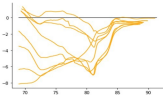

Supplement: s1 [file s1]

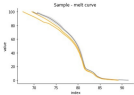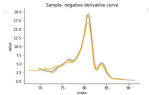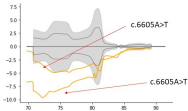

Supplement: s1 [file s1]
